# Supplementary material for: Preferential Selection of Low-Frequency, Lipopolysaccharide-Modified, Colistin-Resistant Mutants with a Combination of Antimicrobials in Acinetobacter baumannii
Source: PubMed Central journal article supplement (PMC9602988; doi:10.1128/spectrum.01928-22), 2022-09-29
Supplement: spectrum.01928-22-s0001.pdf [file spectrum.01928-22-s0001.pdf]

### Colistin

|                           | <i>lpxA</i> | <i>lpxC</i> | <i>lpxD</i> | <i>pmrA</i> | <i>pmrB</i> | Total   |
|---------------------------|-------------|-------------|-------------|-------------|-------------|---------|
| <b>in/del</b>             | 4 (3)       | 13 (11)     | 1 (1)       | 0           | 0           | 18 (15) |
| <b>Substitution</b>       | 13 (6)      | 12 (5)      | 4 (2)       | 0           | 0           | 29 (13) |
| <b>ISAb<sub>a11</sub></b> | 4 (2)       | 11 (7)      | 9 (6)       | 0           | 0           | 24 (15) |
| <b>Total</b>              | 21 (11)     | 36 (22)     | 14 (9)      | 0           | 0           | 71 (43) |

### Colistin+Meropenem

|                           | <i>lpxA</i> * | <i>lpxC</i> * | <i>lpxD</i> * | <i>pmrA</i> | <i>pmrB</i> | Total   |
|---------------------------|---------------|---------------|---------------|-------------|-------------|---------|
| <b>in/del</b>             | 0             | 0             | 0             | 0           | 1           | 0       |
| <b>Substitution</b>       | 0             | 0             | 0             | 12 (4)      | 28 (19)     | 41 (23) |
| <b>ISAb<sub>a11</sub></b> | 0             | 0             | 0             | 0           | 0           | 0       |
| <b>Total</b>              | 0             | 0             | 0             | 12 (4)      | 29 (19)     | 41 (23) |

The numerical value is the number of isolated strains, and (numbers) are the number of independent events.

\* 21 of 41 strains were analyzed.

Supplemental  
Table 2  
Kamoshida et al.

ATCC 19606 Colistin-resistant strains

| Name  | Colony | Genes                  |                        |             |                                  |             | Amino acid change | Mutation gene      |              |
|-------|--------|------------------------|------------------------|-------------|----------------------------------|-------------|-------------------|--------------------|--------------|
|       |        | <i>lpxA</i>            | <i>lpxC</i>            | <i>lpxD</i> | <i>pmrA</i>                      | <i>pmrB</i> |                   |                    |              |
| KL001 | 1      | 591_592delTA           | -                      | -           | -                                | -           | -                 | I198fs(I198*)      | <i>lpxA</i>  |
| KL002 | 1      | 591_592delTA           | -                      | -           | -                                | -           | -                 | I198fs(I198*)      | <i>lpxA</i>  |
| KL003 | 1      | -                      | -                      | -           | -22bp>ISAbA11(AAG^GTT)           | -           | -                 | -                  | <i>lpxD</i>  |
| KL004 | 2      | -                      | 394>ISAbA11(Inversion) | -           | -                                | -           | -                 | L132fs(L132*)      | <i>lpxC</i>  |
| KL005 | 3      | 82delT                 | -                      | -           | -                                | -           | -                 | I28fs(I28Y)V35*    | <i>lpxA</i>  |
| KL006 | 3      | -                      | -                      | -           | -                                | -           | -                 | -                  | Not detected |
| KL007 | 3      | -                      | -                      | -           | -                                | -           | -                 | -                  | Not detected |
| KL008 | 3      | -                      | 630delIT               | -           | -                                | -           | -                 | L211fs(L211*)      | <i>lpxC</i>  |
| KL009 | 3      | 461G>A                 | -                      | -           | -                                | -           | -                 | G154D              | <i>lpxA</i>  |
| KL010 | 3      | 562G>A                 | -                      | -           | -                                | -           | -                 | G188S              | <i>lpxA</i>  |
| KL011 | 3      | -                      | -                      | -           | -                                | -           | -                 | -                  | Not detected |
| KL012 | 3      | 562G>A                 | -                      | -           | -                                | -           | -                 | G188S              | <i>lpxA</i>  |
| KL013 | 3      | 562G>A                 | -                      | -           | -                                | -           | -                 | G188S              | <i>lpxA</i>  |
| KL014 | 3      | 562G>A                 | -                      | -           | -                                | -           | -                 | G188S              | <i>lpxA</i>  |
| KL015 | 3      | 562G>A                 | -                      | -           | -                                | -           | -                 | G188S              | <i>lpxA</i>  |
| KL016 | 3      | 461G>A                 | -                      | -           | -                                | -           | -                 | G188S              | <i>lpxA</i>  |
| KL017 | 3      | 562G>A                 | -                      | -           | -                                | -           | -                 | G188S              | <i>lpxA</i>  |
| KL018 | 3      | 562G>A                 | -                      | -           | -                                | -           | -                 | G188S              | <i>lpxA</i>  |
| KL019 | 4      | -                      | 119G>C                 | -           | -                                | -           | -                 | R40P               | <i>lpxC</i>  |
| KL020 | 5      | -                      | -                      | -           | -                                | -           | -                 | -                  | Not detected |
| KL021 | 5      | -                      | 327_330insATTT         | -           | -                                | -           | -                 | L114fs(L114F)Q122* | <i>lpxC</i>  |
| KL022 | 5      | 315G>A                 | -                      | -           | -                                | -           | -                 | M117I              | <i>lpxA</i>  |
| KL023 | 5      | -                      | 563C>T                 | -           | -                                | -           | -                 | A188V              | <i>lpxC</i>  |
| KL024 | 5      | -                      | 394>ISAbA11(Inversion) | -           | -                                | -           | -                 | L132*              | <i>lpxC</i>  |
| KL025 | 5      | -                      | 563C>T                 | -           | -                                | -           | -                 | A188V              | <i>lpxC</i>  |
| KL026 | 5      | -                      | 563C>T                 | -           | -                                | -           | -                 | A188V              | <i>lpxC</i>  |
| KL027 | 5      | -                      | 563C>T                 | -           | -                                | -           | -                 | A188V              | <i>lpxC</i>  |
| KL028 | 5      | -                      | 563C>T                 | -           | -                                | -           | -                 | A188V              | <i>lpxC</i>  |
| KL029 | 5      | -                      | 563C>T                 | -           | -                                | -           | -                 | A188V              | <i>lpxC</i>  |
| KL030 | 6      | -                      | 97_98delGT             | -           | -                                | -           | -                 | V33fs(V33G)A52*    | <i>lpxC</i>  |
| KL031 | 7      | -                      | 569C>T                 | -           | -                                | -           | -                 | T190I              | <i>lpxC</i>  |
| KL032 | 7      | -                      | -                      | -           | 233>ISAbA11                      | -           | -                 | I78fs(I78G)P83*    | <i>lpxD</i>  |
| KL033 | 8      | -                      | 391>ISAbA11(Inversion) | -           | -                                | -           | -                 | I131fs(I131*)      | <i>lpxC</i>  |
| KL034 | 8      | -                      | 391>ISAbA11(Inversion) | -           | -                                | -           | -                 | I131fs(I131*)      | <i>lpxC</i>  |
| KL035 | 8      | -                      | 391>ISAbA11(Inversion) | -           | -                                | -           | -                 | I131fs(I131*)      | <i>lpxC</i>  |
| KL036 | 8      | -                      | 391>ISAbA11(Inversion) | -           | -                                | -           | -                 | I131fs(I131*)      | <i>lpxC</i>  |
| KL037 | 9      | -                      | 475_689(215bp)del      | -           | -                                | -           | -                 | D159fs(D159C)D161* | <i>lpxC</i>  |
| KL038 | 9      | 469G>A                 | -                      | -           | -                                | -           | -                 | G157R              | <i>lpxA</i>  |
| KL039 | 9      | -                      | -                      | -           | -                                | -           | -                 | -                  | Not detected |
| KL040 | 9      | -                      | 429delA                | -           | -                                | -           | -                 | A144fs(A144Q)M194* | <i>lpxC</i>  |
| KL041 | 9      | -                      | -                      | -           | 749C>T                           | -           | -                 | T250I              | <i>lpxD</i>  |
| KL042 | 10     | -                      | 327_330delATTT         | -           | -                                | -           | -                 | Y112fs(Y112C)F128* | <i>lpxC</i>  |
| KL043 | 10     | 263>ISAbA11(Inversion) | -                      | -           | -                                | -           | -                 | N88fs(N88)S96*     | <i>lpxA</i>  |
| KL044 | 10     | -                      | 327_330delATTT         | -           | -                                | -           | -                 | Y112fs(Y112C)F128* | <i>lpxC</i>  |
| KL045 | 10     | -                      | -                      | -           | -3bp>ISAbA11(Inversion)(AAa^tta) | -           | -                 | -                  | <i>lpxD</i>  |
| KL046 | 10     | -                      | 327_330delATTT         | -           | -                                | -           | -                 | Y112fs(Y112C)F128* | <i>lpxC</i>  |
| KL047 | 11     | -                      | 327_330delATTT         | -           | -                                | -           | -                 | Y112fs(Y112C)F128* | <i>lpxC</i>  |
| KL048 | 11     | 413>ISAbA11            | -                      | -           | -                                | -           | -                 | V140fs(V140L)H143* | <i>lpxA</i>  |
| KL049 | 11     | 413>ISAbA11            | -                      | -           | -                                | -           | -                 | V140fs(V140L)H143* | <i>lpxA</i>  |
| KL050 | 11     | -                      | 394>ISAbA11(Inversion) | -           | -                                | -           | -                 | L132fs(L132*)      | <i>lpxC</i>  |
| KL051 | 11     | 413>ISAbA11            | -                      | -           | -                                | -           | -                 | V140fs(V140L)H143* | <i>lpxA</i>  |
| KL052 | 11     | -                      | -                      | -           | 271A>C                           | -           | -                 | T91P               | <i>lpxD</i>  |
| KL053 | 11     | -                      | -                      | -           | 271A>C                           | -           | -                 | T91P               | <i>lpxD</i>  |
| KL054 | 11     | -                      | -                      | -           | 271A>C                           | -           | -                 | T91P               | <i>lpxD</i>  |
| KL055 | 11     | -                      | -                      | -           | 218insA                          | -           | -                 | D75fs(D75R)N76*    | <i>lpxD</i>  |
| KL056 | 12     | -                      | -                      | -           | -                                | -           | -                 | -                  | Not detected |
| KL057 | 12     | -                      | -                      | -           | -                                | -           | -                 | -                  | Not detected |
| KL058 | 12     | 306_310delGCAA         | -                      | -           | -                                | -           | -                 | Q103fs(Q103)A106*  | <i>lpxA</i>  |
| KL059 | 12     | -                      | -                      | -           | 232>ISAbA11(Inversion)           | -           | -                 | I78fs(I78*)        | <i>lpxD</i>  |
| KL060 | 12     | -                      | -                      | -           | 232>ISAbA11(Inversion)           | -           | -                 | I78fs(I78*)        | <i>lpxD</i>  |
| KL061 | 13     | -                      | 327_330insATTT         | -           | -                                | -           | -                 | Y112fs(Y112C)F128* | <i>lpxC</i>  |
| KL062 | 13     | -                      | 392>ISAbA11            | -           | -                                | -           | -                 | L132fs(L132G)E136* | <i>lpxC</i>  |
| KL063 | 13     | -                      | 703G>T                 | -           | -                                | -           | -                 | V235F              | <i>lpxC</i>  |
| KL064 | 13     | -                      | 703G>T                 | -           | -                                | -           | -                 | V235F              | <i>lpxC</i>  |
| KL065 | 13     | -                      | 811>ISAbA11            | -           | -                                | -           | -                 | L271fs(L271*)      | <i>lpxC</i>  |
| KL066 | 13     | -                      | 703G>T                 | -           | -                                | -           | -                 | V235F              | <i>lpxC</i>  |
| KL067 | 13     | -                      | -                      | -           | -                                | -           | -                 | -                  | Not detected |
| KL068 | 13     | -                      | -35bpA>G               | -           | -                                | -           | -                 | -                  | <i>lpxC</i>  |
| KL069 | 13     | -                      | 811>ISAbA11            | -           | -                                | -           | -                 | L271fs(L271*)      | <i>lpxC</i>  |
| KL070 | 13     | -                      | -                      | -           | -2bp>ISAbA11(Inversion)(Aat^taA) | -           | -                 | -                  | <i>lpxD</i>  |
| KL071 | 14     | -                      | 327_330insATTT         | -           | -                                | -           | -                 | L114fs(L114F)Q122* | <i>lpxC</i>  |
| KL072 | 14     | -                      | 327_330delATTT         | -           | -                                | -           | -                 | Y112fs(Y112C)F128* | <i>lpxC</i>  |
| KL073 | 15     | -                      | 327_330delATTT         | -           | -                                | -           | -                 | Y112fs(Y112C)F128* | <i>lpxC</i>  |
| KL074 | 15     | -                      | -                      | -           | -                                | -           | -                 | -                  | Not detected |
| KL075 | 15     | -                      | -                      | -           | -                                | -           | -                 | -                  | Not detected |
| KL076 | 15     | 604C>T, 606A>T         | -                      | -           | -                                | -           | -                 | R202C              | <i>lpxA</i>  |
| KL077 | 15     | -                      | -                      | -           | -                                | -           | -                 | -                  | Not detected |
| KL078 | 15     | -                      | -                      | -           | -                                | -           | -                 | -                  | Not detected |
| KL079 | 15     | -                      | -                      | -           | -                                | -           | -                 | -                  | Not detected |
| KL080 | 15     | -                      | -                      | -           | -                                | -           | -                 | -                  | Not detected |
| KL081 | 15     | 604C>T                 | -                      | -           | -                                | -           | -                 | R202*              | <i>lpxA</i>  |
| KL082 | 15     | -                      | 394>ISAbA11            | -           | -                                | -           | -                 | L132fs(L132*)      | <i>lpxC</i>  |
| KL083 | 16     | -                      | -                      | -           | -22bp>ISAbA11(AAG^GTT)           | -           | -                 | -                  | <i>lpxD</i>  |
| KL084 | 16     | -                      | -                      | -           | -22bp>ISAbA11(AAG^GTT)           | -           | -                 | -                  | <i>lpxD</i>  |
| KL085 | 16     | -                      | -                      | -           | -22bp>ISAbA11(AAG^GTT)           | -           | -                 | -                  | <i>lpxD</i>  |

| <b>Mutation gene</b> | <b>Name</b> | <b>Mutation</b>         | <b>Colistin MIC (μg/ml)</b> |
|----------------------|-------------|-------------------------|-----------------------------|
| <i>lpxA</i>          | KL001       | 591_592delTA: I198fs    | 128                         |
| <i>lpxA</i>          | KL009       | 461G>A: G154D           | 128                         |
| <i>lpxA</i>          | KL010       | 562G>A: G188S           | 128                         |
| <i>lpxA</i>          | KL022       | 315G>A: M117I           | 256                         |
| <i>lpxA</i>          | KL038       | 469G>A: G157R           | 128                         |
| <i>lpxA</i>          | KL076       | 604C>T, 606A>T: R202C   | 128                         |
| <i>lpxC</i>          | KL037       | 475_689(215)del: D159fs | 64                          |
| <i>lpxC</i>          | KL019       | 119G>C: R40P            | 128                         |
| <i>lpxC</i>          | KL023       | 563C>T: A188V           | 256                         |
| <i>lpxC</i>          | KL031       | 569C>T: T190I           | 128                         |
| <i>lpxC</i>          | KL063       | 703G>T: V235F           | 256                         |
| <i>lpxD</i>          | KL055       | 218insA: D75fs          | 64                          |
| <i>lpxD</i>          | KL041       | 749C>T: T250I           | 128                         |
| <i>lpxD</i>          | KL052       | 271A>C: T91P            | 8                           |

NCBI BioSample

| BioSample ID | Amino acids |      |       |       |                          | Colistin MIC | Mutation     |
|--------------|-------------|------|-------|-------|--------------------------|--------------|--------------|
|              | LpxA        | LpxC | LpxD  | PmrA  | PmrB                     |              |              |
| 12087735     | -           | -    | -     | -     | A138T, R263H             | >256         | PmrB         |
| 4901700      | -           | -    | -     | K172I | -                        | 8            | PmrA         |
| 4901699      | -           | -    | -     | K172I | -                        | 8            | PmrA         |
| 4901698      | -           | -    | -     | -     | P170S                    | 8            | PmrB         |
| 4901697      | -           | -    | -     | -     | P170L                    | >8           | PmrB         |
| 4901694      | -           | -    | -     | -     | -                        | 4            | Not detected |
| 4901693      | -           | -    | -     | -     | H266Y, Q270P             | >8           | PmrB         |
| 4901678      | -           | -    | -     | -     | T235I                    | >8           | PmrB         |
| 6837835      | -           | -    | -     | D10E  | V133G, P154T             | >4           | PmrAB        |
| 6837830      | -           | -    | -     | -     | L33P                     | >4           | PmrB         |
| 6837819      | -           | -    | -     | -     | 20bp>ISAba125(insertion) | >4           | PmrB         |
| 6837812      | -           | -    | -     | -     | -                        | >4           | Not detected |
| 6837767      | -           | -    | -     | -     | L239I                    | >4           | PmrB         |
| 6837762      | -           | -    | -     | -     | -                        | >4           | Not detected |
| 6837757      | -           | -    | -     | -     | -                        | >4           | Not detected |
| 6837753      | -           | -    | D75G  | -     | -                        | 4            | LpxD         |
| 6837751      | -           | -    | -     | M6K   | -                        | >4           | PmrB         |
| 6827875      | -           | -    | -     | I173F | -                        | >4           | PmrB         |
| 6892294      | -           | -    | S100T | -     | -                        | >4           | LpxD         |
| 6892290      | -           | -    | -     | -     | P170L, N337H             | >4           | PmrB         |
| 6892289      | -           | -    | -     | I173F | -                        | >4           | PmrA         |
| 4254730      | -           | -    | -     | E8D   | Y116H                    | >256         | PmrAB        |
| 4254728      | -           | -    | -     | -     | S17R                     | 192          | PmrB         |
| 4254727      | -           | -    | -     | -     | T232I                    | 128          | PmrB         |

ATCC 19606 Colistin-meropenem-resistant strains

| Name  | Colony | Genes       |             |             |             |                                                         | Amino acid change                       | Mutation gene |             |
|-------|--------|-------------|-------------|-------------|-------------|---------------------------------------------------------|-----------------------------------------|---------------|-------------|
|       |        | <i>lpxA</i> | <i>lpxC</i> | <i>lpxD</i> | <i>pmrA</i> | <i>pmrB</i>                                             |                                         |               |             |
| CM001 | 1      | -           | -           | -           | -           | -                                                       | 695C>T                                  | T232I         | <i>pmrB</i> |
| CM002 | 1      | -           | -           | -           | -           | -                                                       | 695C>T                                  | T232I         | <i>pmrB</i> |
| CM003 | 2      | -           | -           | -           | -           | -                                                       | 692G>T                                  | R231L         | <i>pmrB</i> |
| CM004 | 2      | -           | -           | -           | -           | -                                                       | 692G>T                                  | R231L         | <i>pmrB</i> |
| CM005 | 2      | -           | -           | -           | -           | -                                                       | 692G>T                                  | R231L         | <i>pmrB</i> |
| CM006 | 2      | -           | -           | -           | -           | -                                                       | 692G>T                                  | R231L         | <i>pmrB</i> |
| CM008 | 2      | -           | -           | -           | -           | -                                                       | 692G>T                                  | R231L         | <i>pmrB</i> |
| CM011 | 3      | -           | -           | -           | -           | -                                                       | 680C>T                                  | A227V         | <i>pmrB</i> |
| CM012 | 3      | -           | -           | -           | -           | -                                                       | 697C>T                                  | P233S         | <i>pmrB</i> |
| CM015 | 3      | -           | -           | -           | -           | -                                                       | 680C>T                                  | A227V         | <i>pmrB</i> |
| CM016 | 3      | -           | -           | -           | -           | -                                                       | 680C>T                                  | A227V         | <i>pmrB</i> |
| CM017 | 3      | -           | -           | -           | -           | -                                                       | 680C>T                                  | A227V         | <i>pmrB</i> |
| CM018 | 4      | -           | -           | -           | -           | -                                                       | 787C>G                                  | R263G         | <i>pmrB</i> |
| CM019 | 5      | -           | -           | -           | -           | -                                                       | 794A>C                                  | Q265P         | <i>pmrB</i> |
| CM020 | 6      | -           | -           | -           | -           | -                                                       | 697C>T                                  | P233S         | <i>pmrB</i> |
| CM021 | 7      | -           | -           | -           | -           | -                                                       | 787C>T                                  | R263C         | <i>pmrB</i> |
| CM022 | 7      | -           | -           | -           | 36G>T       | -                                                       | -                                       | M12I          | <i>pmrA</i> |
| CM023 | 7      | -           | -           | -           | 36G>T       | -                                                       | -                                       | M12I          | <i>pmrA</i> |
| CM024 | 8      | -           | -           | -           | -           | 42(AATTTTCAGTGTCAT<br>CTTAGGTTGTATTTT)71<br>duplication | 28-37 position insertion<br>+VILGCILIFS | -             | <i>pmrB</i> |
| CM025 | 9      | -           | -           | -           | -           | -                                                       | 937G>T                                  | D313Y         | <i>pmrB</i> |
| CM026 | 9      | -           | -           | -           | -           | -                                                       | 937G>C                                  | D313H         | <i>pmrB</i> |
| CM027 | 10     | N.T.        | N.T.        | N.T.        | -           | -                                                       | 794A>C                                  | Q265P         | <i>pmrB</i> |
| CM028 | 11     | N.T.        | N.T.        | N.T.        | 36G>T       | -                                                       | -                                       | M12I          | <i>pmrA</i> |
| CM029 | 11     | N.T.        | N.T.        | N.T.        | -           | -                                                       | 680C>T                                  | A227V         | <i>pmrB</i> |
| CM031 | 12     | N.T.        | N.T.        | N.T.        | -           | -                                                       | 944G>A                                  | G315D         | <i>pmrB</i> |
| CM032 | 12     | N.T.        | N.T.        | N.T.        | -           | -                                                       | 944G>A                                  | G315D         | <i>pmrB</i> |
| CM033 | 12     | N.T.        | N.T.        | N.T.        | -           | -                                                       | 680C>T                                  | A227V         | <i>pmrB</i> |
| CM034 | 12     | N.T.        | N.T.        | N.T.        | -           | -                                                       | 704C>T                                  | T235I         | <i>pmrB</i> |
| CM035 | 13     | N.T.        | N.T.        | N.T.        | -           | -                                                       | 788G>A                                  | R263H         | <i>pmrB</i> |
| CM036 | 13     | N.T.        | N.T.        | N.T.        | -           | -                                                       | 788G>A                                  | R263H         | <i>pmrB</i> |
| CM038 | 14     | N.T.        | N.T.        | N.T.        | -           | -                                                       | 697C>T                                  | P233S         | <i>pmrB</i> |
| CM041 | 15     | N.T.        | N.T.        | N.T.        | 34A>G       | -                                                       | -                                       | M12V          | <i>pmrA</i> |
| CM042 | 15     | N.T.        | N.T.        | N.T.        | 34A>G       | -                                                       | -                                       | M12V          | <i>pmrA</i> |
| CM043 | 15     | N.T.        | N.T.        | N.T.        | 34A>G       | -                                                       | -                                       | M12V          | <i>pmrA</i> |
| CM044 | 15     | N.T.        | N.T.        | N.T.        | 34A>G       | -                                                       | -                                       | M12V          | <i>pmrA</i> |
| CM045 | 15     | N.T.        | N.T.        | N.T.        | 34A>G       | -                                                       | -                                       | M12V          | <i>pmrA</i> |
| CM046 | 15     | N.T.        | N.T.        | N.T.        | 34A>G       | -                                                       | -                                       | M12V          | <i>pmrA</i> |
| CM047 | 15     | N.T.        | N.T.        | N.T.        | -           | -                                                       | 787C>G                                  | R263G         | <i>pmrB</i> |
| CM048 | 15     | N.T.        | N.T.        | N.T.        | 34A>G       | -                                                       | -                                       | M12V          | <i>pmrA</i> |
| CM049 | 15     | N.T.        | N.T.        | N.T.        | 34A>G       | -                                                       | -                                       | M12V          | <i>pmrA</i> |
| CM051 | 16     | N.T.        | N.T.        | N.T.        | 38G>T       | -                                                       | -                                       | I13S          | <i>pmrA</i> |

N.T. Not Tested

**ATCC 19606 Colistin-ciprofloxacin-resistant strains**

| Name    | Colony |             |             | Amino acid change | Mutation gene |
|---------|--------|-------------|-------------|-------------------|---------------|
|         |        | <i>pmrA</i> | <i>pmrB</i> |                   |               |
| CpCL001 | 1      | -           | 689C>T      | A226V             | <i>pmrB</i>   |
| CpCL002 | 1      | -           | 787C>T      | R263C             | <i>pmrB</i>   |
| CpCL003 | 1      | -           | 787C>T      | R263C             | <i>pmrB</i>   |
| CpCL004 | 1      | -           | 787C>T      | R263C             | <i>pmrB</i>   |
| CpCL005 | 2      | 239C>T      | -           | A80V              | <i>pmrA</i>   |
| CpCL006 | 2      | -           | 821T>G      | L274W             | <i>pmrB</i>   |
| CpCL007 | 3      | -           | 794A>C      | Q265P             | <i>pmrB</i>   |
| CpCL008 | 3      | -           | 944G>C      | G315D             | <i>pmrB</i>   |
| CpCL009 | 4      | -           | 697C>T      | P233S             | <i>pmrB</i>   |
| CpCL010 | 4      | -           | 49A>C       | S17R              | <i>pmrB</i>   |
| CpCL011 | 5      | -           | 676G>A      | A226T             | <i>pmrB</i>   |
| CpCL012 | 5      | -           | 676G>A      | A226T             | <i>pmrB</i>   |
| CpCL013 | 6      | -           | 680C>T      | A227V             | <i>pmrB</i>   |
| CpCL014 | 6      | -           | 692G>A      | R231Q             | <i>pmrB</i>   |
| CpCL015 | 6      | -           | 716T>C      | L239S             | <i>pmrB</i>   |
| CpCL016 | 6      | -           | 716T>C      | L239S             | <i>pmrB</i>   |
| CpCL017 | 6      | -           | 716T>C      | L239S             | <i>pmrB</i>   |

**ATCC BAA-1605 Colistin-resistant strains**

| Name    | Colony | Genes       |             | Amino acid change | Mutation gene |
|---------|--------|-------------|-------------|-------------------|---------------|
|         |        | <i>pmrA</i> | <i>pmrB</i> |                   |               |
| BAAC001 | 1      | 60G>C       | -           | L20F              | <i>pmrA</i>   |
| BAAC002 | 1      | 60G>T       | -           | L20F              | <i>pmrA</i>   |
| BAAC003 | 1      | 60G>T       | -           | L20F              | <i>pmrA</i>   |
| BAAC009 | 2      | -           | 704C>T      | T235I             | <i>pmrB</i>   |
| BAAC010 | 2      | -           | 704C>T      | T235I             | <i>pmrB</i>   |
| BAAC033 | 6      | -           | 707C>A      | T235I             | <i>pmrB</i>   |
| BAAC044 | 7      | -           | 697C>T      | P233S             | <i>pmrB</i>   |
| BAAC045 | 7      | -           | 686A>C      | E229A             | <i>pmrB</i>   |
| BAAC046 | 7      | -           | 944G>T      | G315V             | <i>pmrB</i>   |
| BAAC066 | 10     | -           | 944G>A      | G315D             | <i>pmrB</i>   |
| BAAC067 | 10     | -           | 944G>A      | G315D             | <i>pmrB</i>   |

**ATCC BAA-1605 Colistin-meropenem-resistant strains**

| Name     | Colony | Genes       |             | Amino acid change | Mutation gene |
|----------|--------|-------------|-------------|-------------------|---------------|
|          |        | <i>pmrA</i> | <i>pmrB</i> |                   |               |
| BAACM001 | 1      | 60G>C       | -           | L20F              | <i>pmrA</i>   |
| BAACM002 | 1      | 60G>T       | -           | L20F              | <i>pmrA</i>   |
| BAACM003 | 1      | 60G>T       | -           | L20F              | <i>pmrA</i>   |
| BAACM004 | 1      | 60G>C       | -           | L20F              | <i>pmrA</i>   |
| BAACM005 | 1      | 60G>T       | -           | L20F              | <i>pmrA</i>   |
| BAACM006 | 1      | 60G>T       | -           | L20F              | <i>pmrA</i>   |
| BAACM007 | 1      | -           | 704C>T      | T235I             | <i>pmrB</i>   |
| BAACM008 | 1      | 60G>C       | -           | L20F              | <i>pmrA</i>   |
| BAACM009 | 1      | 60G>C       | -           | L20F              | <i>pmrA</i>   |
| BAACM010 | 1      | 60G>T       | -           | L20F              | <i>pmrA</i>   |
| BAACM011 | 1      | 60G>T       | -           | L20F              | <i>pmrA</i>   |
| BAACM012 | 4      | -           | 697C>T      | P233S             | <i>pmrB</i>   |
| BAACM013 | 5      | -           | 938A>T      | D313V             | <i>pmrB</i>   |
| BAACM014 | 5      | 60G>C       | -           | L20F              | <i>pmrA</i>   |
| BAACM015 | 6      | 60G>C       | -           | L20F              | <i>pmrA</i>   |
| BAACM016 | 6      | 60G>C       | -           | L20F              | <i>pmrA</i>   |
| BAACM017 | 7      | -           | 944G>T      | G315V             | <i>pmrB</i>   |
| BAACM018 | 7      | -           | 787C>G      | R263G             | <i>pmrB</i>   |
| BAACM019 | 7      | 60G>C       | -           | L20F              | <i>pmrA</i>   |
| BAACM020 | 7      | 60G>C       | -           | L20F              | <i>pmrA</i>   |
| BAACM021 | 7      | -           | 699A>C      | E229D             | <i>pmrB</i>   |
| BAACM022 | 7      | -           | 699A>C      | E229D             | <i>pmrB</i>   |
| BAACM023 | 8      | -           | 698A>C      | P233H             | <i>pmrB</i>   |
| BAACM024 | 8      | -           | 788G>A      | R263H             | <i>pmrB</i>   |
| BAACM025 | 8      | -           | 698A>C      | P233H             | <i>pmrB</i>   |
| BAACM026 | 9      | -           | 787C>G      | R263G             | <i>pmrB</i>   |
| BAACM027 | 10     | -           | 788G>A      | R263H             | <i>pmrB</i>   |

IS insertion in ATCC BAA-1605 Colistin-resistant strains

| Name    | Colony | Genes       |             |             | Remark               |
|---------|--------|-------------|-------------|-------------|----------------------|
|         |        | <i>lpxA</i> | <i>lpxC</i> | <i>lpxD</i> |                      |
| BAAC001 | 1      | -           | -           | -           | <i>pmrA</i> mutation |
| BAAC002 | 1      | -           | -           | -           | <i>pmrA</i> mutation |
| BAAC003 | 1      | -           | -           | -           | <i>pmrA</i> mutation |
| BAAC004 | 1      | -           | -           | ○           | -                    |
| BAAC005 | 1      | -           | ○           | -           | -                    |
| BAAC006 | 1      | -           | ○           | -           | -                    |
| BAAC007 | 1      | -           | ○           | -           | -                    |
| BAAC008 | 1      | -           | -           | -           | <i>pmrB</i> mutation |
| BAAC009 | 2      | -           | -           | -           | <i>pmrB</i> mutation |
| BAAC010 | 2      | -           | -           | -           | -                    |
| BAAC011 | 2      | -           | -           | -           | -                    |
| BAAC012 | 2      | -           | ○           | -           | -                    |
| BAAC013 | 2      | -           | ○           | -           | -                    |
| BAAC014 | 2      | -           | -           | -           | -                    |
| BAAC015 | 2      | ○           | -           | -           | -                    |
| BAAC016 | 2      | -           | ○           | -           | -                    |
| BAAC017 | 3      | -           | -           | -           | -                    |
| BAAC018 | 3      | -           | -           | -           | -                    |
| BAAC019 | 3      | -           | ○           | -           | -                    |
| BAAC020 | 3      | -           | ○           | -           | -                    |
| BAAC021 | 4      | -           | ○           | -           | -                    |
| BAAC022 | 4      | -           | ○           | -           | -                    |
| BAAC023 | 4      | -           | ○           | -           | -                    |
| BAAC024 | 4      | -           | -           | -           | -                    |
| BAAC025 | 5      | -           | ○           | -           | -                    |
| BAAC026 | 5      | -           | -           | -           | -                    |
| BAAC027 | 5      | -           | -           | -           | -                    |
| BAAC028 | 5      | -           | ○           | -           | -                    |
| BAAC029 | 5      | -           | -           | -           | -                    |
| BAAC030 | 5      | -           | -           | -           | -                    |
| BAAC031 | 5      | -           | ○           | -           | -                    |
| BAAC032 | 5      | -           | -           | -           | -                    |
| BAAC033 | 6      | -           | -           | -           | <i>pmrB</i> mutation |
| BAAC034 | 6      | -           | ○           | -           | -                    |
| BAAC035 | 6      | -           | -           | -           | -                    |
| BAAC036 | 6      | -           | ○           | -           | -                    |
| BAAC037 | 6      | -           | ○           | -           | -                    |
| BAAC038 | 6      | -           | -           | -           | -                    |
| BAAC039 | 6      | -           | ○           | -           | -                    |
| BAAC040 | 6      | -           | -           | -           | -                    |
| BAAC041 | 6      | -           | -           | -           | -                    |
| BAAC042 | 6      | -           | -           | -           | -                    |
| BAAC043 | 6      | -           | ○           | -           | -                    |
| BAAC044 | 7      | -           | -           | -           | <i>pmrB</i> mutation |
| BAAC045 | 7      | -           | -           | -           | <i>pmrB</i> mutation |
| BAAC046 | 7      | -           | -           | -           | <i>pmrB</i> mutation |
| BAAC047 | 7      | -           | -           | -           | -                    |
| BAAC048 | 7      | -           | -           | -           | -                    |
| BAAC049 | 7      | -           | -           | -           | -                    |
| BAAC050 | 7      | -           | -           | -           | -                    |
| BAAC051 | 7      | -           | -           | -           | -                    |
| BAAC052 | 7      | -           | -           | -           | -                    |
| BAAC053 | 7      | -           | -           | -           | -                    |
| BAAC054 | 7      | -           | ○           | -           | -                    |
| BAAC055 | 7      | -           | ○           | -           | -                    |
| BAAC056 | 7      | -           | -           | ○           | -                    |
| BAAC057 | 7      | ○           | -           | -           | -                    |
| BAAC058 | 8      | -           | -           | -           | -                    |
| BAAC059 | 8      | -           | ○           | -           | -                    |
| BAAC060 | 9      | -           | ○           | -           | -                    |
| BAAC061 | 9      | -           | -           | ○           | -                    |
| BAAC062 | 9      | -           | ○           | -           | -                    |
| BAAC063 | 9      | -           | -           | -           | -                    |
| BAAC064 | 9      | -           | -           | -           | -                    |
| BAAC065 | 9      | -           | -           | -           | -                    |
| BAAC066 | 10     | -           | -           | -           | <i>pmrB</i> mutation |
| BAAC067 | 10     | -           | -           | -           | <i>pmrB</i> mutation |
| BAAC068 | 10     | -           | ○           | -           | -                    |
| BAAC069 | 10     | -           | ○           | -           | -                    |
| BAAC070 | 10     | -           | ○           | -           | -                    |
| BAAC071 | 10     | -           | ○           | -           | -                    |



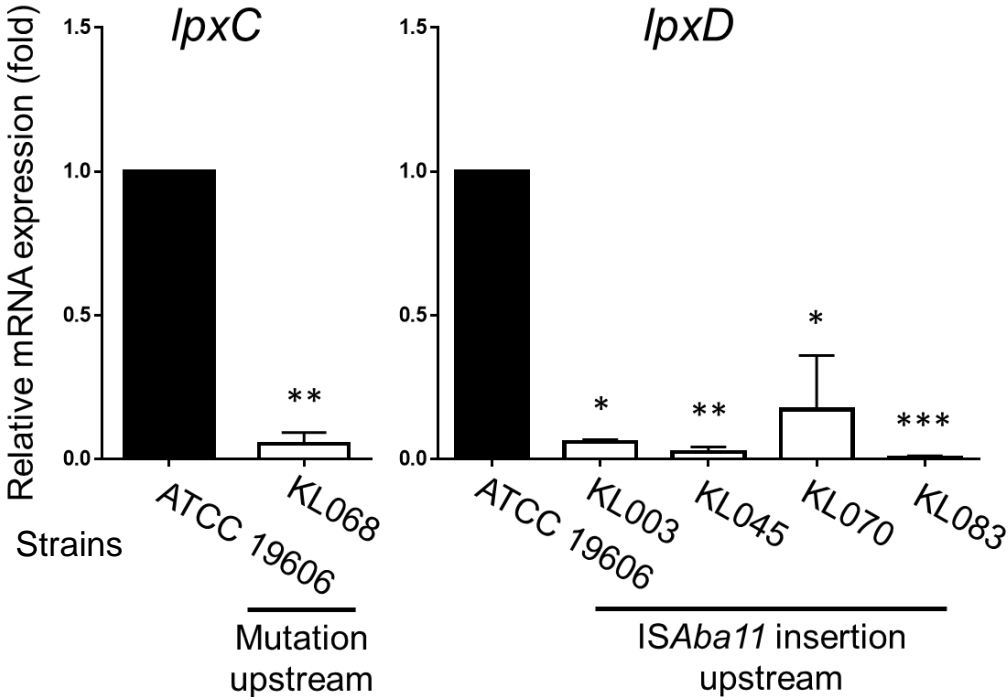

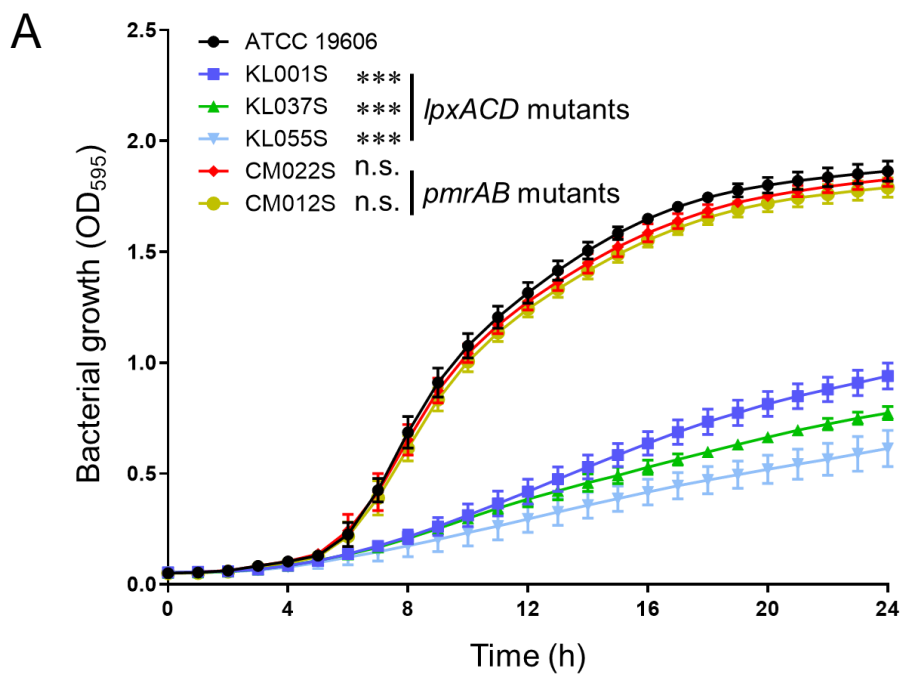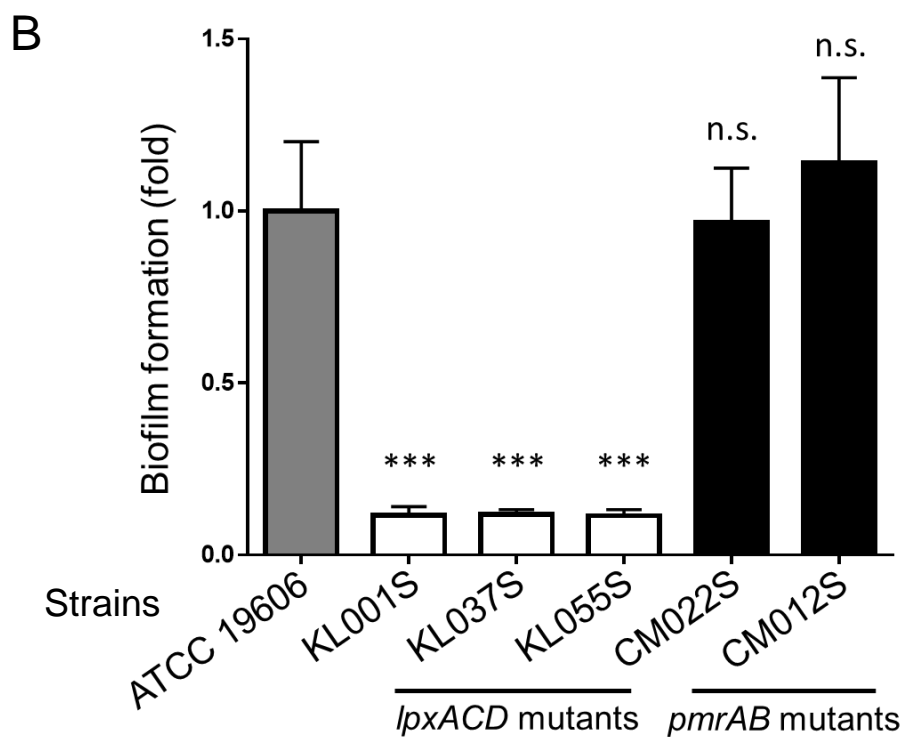

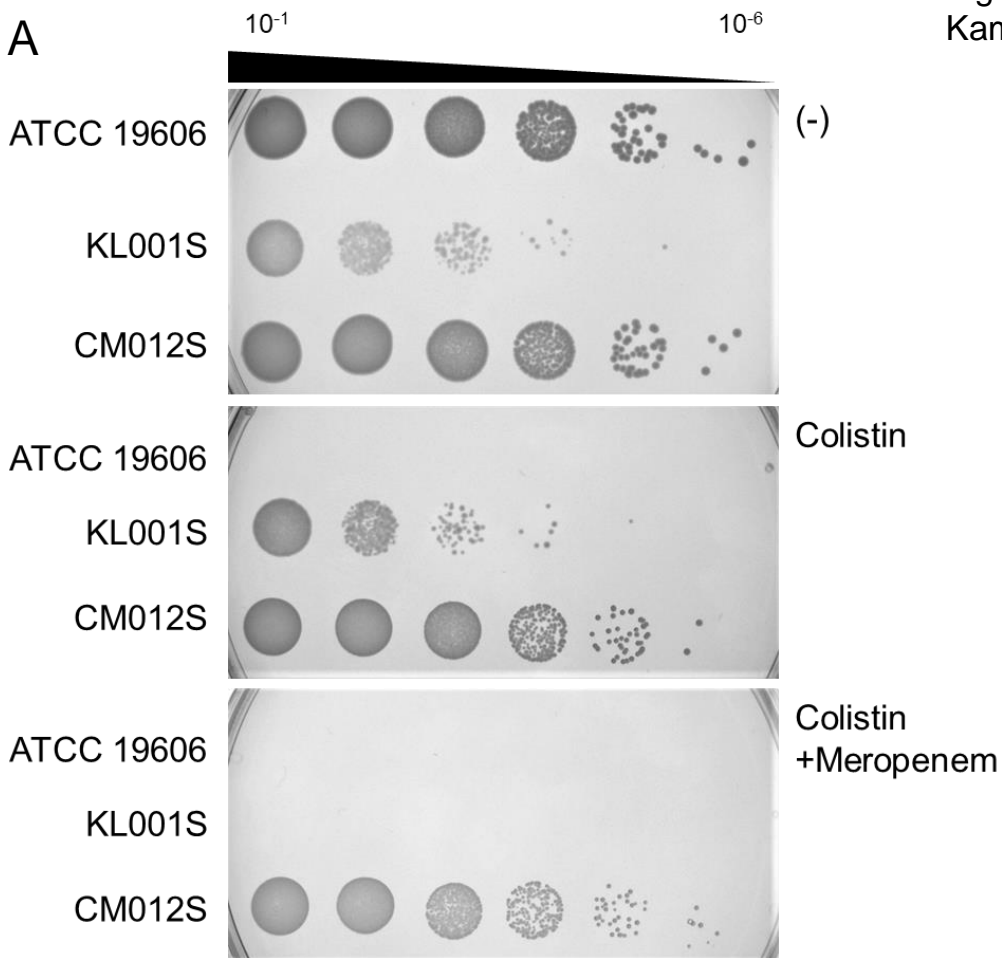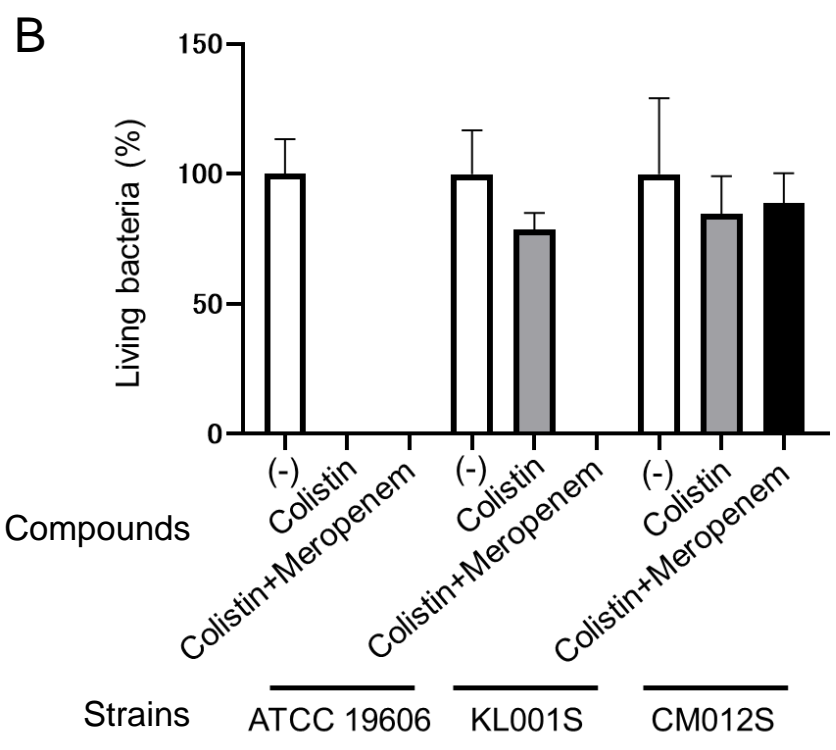

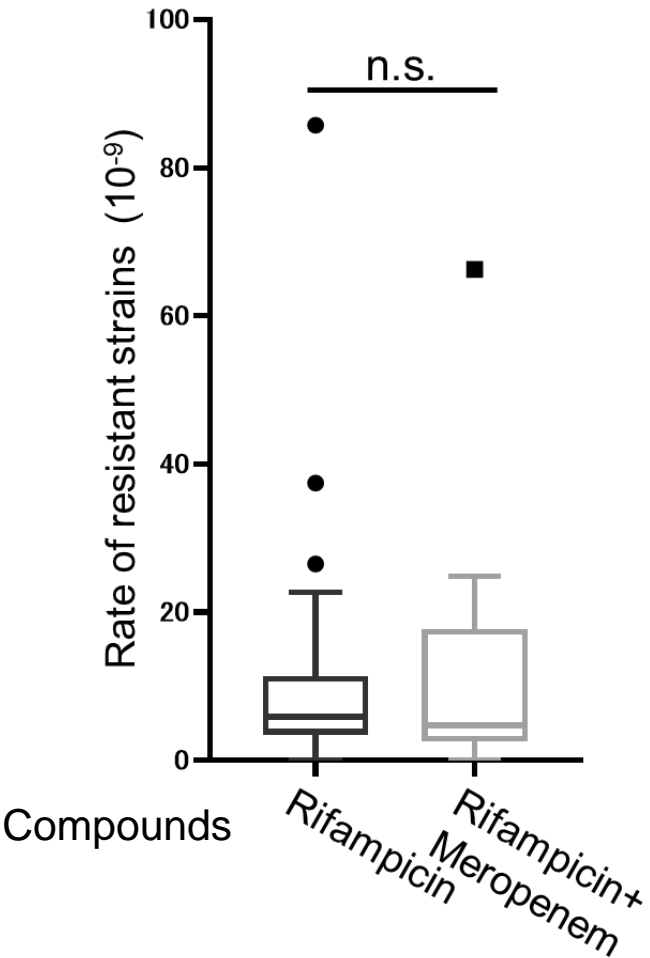

- 1 **Supplemental TABLE 1** Types of mutations in colistin-resistant strains of *A. baumannii*  
2 ATCC 19606.
- 3 **Supplemental TABLE 2** List of mutations in colistin-resistant strains of *A. baumannii*  
4 ATCC 19606.
- 5 **Supplemental TABLE 3** Minimum inhibitory concentrations (MICs) of colistin in  
6 representative *A. baumannii* strains with amino acid substitutions and frameshift  
7 mutations in LpxACD.
- 8 **Supplemental TABLE 4** List of mutations and minimum inhibitory concentrations  
9 (MICs) of colistin in *A. baumannii* strains (NCBI BioSample).
- 10 **Supplemental TABLE 5** List of mutations in colistin-meropenem-resistant strains of *A.*  
11 *baumannii* ATCC 19606.
- 12 **Supplemental TABLE 6** List of mutations in colistin-ciprofloxacin-resistant strains of *A.*  
13 *baumannii* ATCC 19606.
- 14 **Supplemental TABLE 7** List of mutations in colistin-resistant and colistin-meropenem-  
15 resistant strains of *A. baumannii* ATCC BAA-1605.
- 16 **Supplemental TABLE 8** Insertion sequences (ISs) in colistin-resistant strains of *A.*  
17 *baumannii* ATCC BAA-1605.
- 18

19 **Supplemental FIGURE LEGENDS**

20 **Supplemental FIG 1** Expression of *lpxCD* mRNA in colistin-resistant strains with  
21 upstream mutations (*lpxC*: KL068; *lpxD*: KL003, KL045, KL070, KL083; and wild-type:  
22 ATCC 19606) was analyzed using quantitative reverse transcription-PCR (qRT-PCR). *A.*  
23 *baumannii* was grown in LB broth at 37 °C with shaking until OD<sub>600</sub> reached 0.75. Total  
24 RNA was extracted and reverse-transcribed; RT-qPCR was performed using the  
25 intercalator method (TB Green). Data are presented as the mean ± SD ( $n = 3$  per group).  
26 Comparison using one-way ANOVA. \*\*\* $p < 0.001$ , \*\* $p < 0.01$ , \* $p < 0.05$ .

27

28 **Supplemental FIG 2** Growth and biofilm formation of colistin-resistant *A. baumannii*  
29 strains. (A) ATCC 19606 (wild-type strain) and representative strains with initial OD<sub>600</sub>  
30 0.001 were grown in LB broth at 37 °C for 24 h. Absorbance at 595 nm was measured at  
31 the indicated time points. Data are presented as the mean ± SD;  $n = 3$  per group compared  
32 by two-way ANOVA. n.s., not significant, \*\*\* $p < 0.001$ . (B) The biofilm formation ability  
33 of the representative strains was analyzed by the crystal violet staining method. Data are  
34 presented as the mean ± SD;  $n = 3$  per group. Compared by one-way ANOVA. n.s., not  
35 significant, \*\*\* $p < 0.001$ .

36

37 **Supplemental FIG 3** Bactericidal activity of antibiotics against LPS-modified and LPS-  
38 deficient strains of *A.baumannii* ATCC 19606. (A) Representative images of KL001S and  
39 CM012S, LPS-deficient and LPS-modified strains, respectively, and ATCC 19606 as the  
40 wild-type strain spotted on each plate. The culture (OD<sub>600</sub> 1.0) was serially diluted (10<sup>-1</sup>  
41 to 10<sup>-6</sup>) and 10 μL of each dilution was spotted onto the plates. The upper part of the plate  
42 does not contain any antibiotics, the middle part contains 5× MIC (10 μg/mL) of colistin,  
43 and the lower part contains 10 μg/mL of colistin and 1/5× MIC (0.1 μg/mL) of  
44 meropenem. (B) The CFU obtained on the non-antibiotic plates was used to calculate the  
45 percentage of surviving bacteria. Data are presented as the mean ± SD (*n* = 3 per group).

46

47 **Supplemental FIG 4** Frequency of resistance to rifampicin alone or in combination with  
48 1/5× MIC (0.1 μg/mL) of meropenem. The culture (0.1 mL of *A. baumannii* ATCC 19606  
49 overnight culture) was plated on LB agar containing 5× MIC (10 μg/mL) of rifampicin  
50 with or without 0.1 μg/mL of meropenem. Data are shown as box plots; *n* = 20  
51 independent assays compared by the Mann–Whitney *U*-test. n.s., not significant.

52
